# Supplementary material for: Two energetic complexes incorporating 3,5-dinitrobenzoic acid and azole ligands: microwave-assisted synthesis, favorable detonation properties, insensitivity and effects on the thermal decomposition of RDX
Source: Royal Society of Chemistry journal article supplement (doi:10.1039/c6nj00197a), 2016-01-01
Supplement: c6nj00197a1.pdf [file c6nj00197a1.pdf]

## Supplementary materials for New Journal of Chemistry

### Two energetic complexes incorporating 3,5-dinitrobenzoic acid and azole ligands: Microwave-assisted syntheses, favorable detonation properties, insensitivity and effects on the thermal decomposition of RDX

Qi Yang\*, Jing Ge, Qibing Gong, Xiaxia Song, Jinwen Zhao, Qing Wei, Gang Xie, Sanping  
Chen\* , Shengli Gao

*Key Laboratory of Synthetic and Natural Functional Molecule Chemistry of Ministry of Education,  
College of Chemistry and Materials Science, Northwest University, Xi'an, Shaanxi 710127, China*

#### Table of contents

**Table S1** Selected bond distances (Å) and angles (°) for **1** and **2**

**Table S2** Hydrogen bonding interactions in **1**

**Fig. S1** XRPD curves for complex **1**

**Fig. S2** XRPD curves for complex **2**

**Fig. S3** TG curve of complex **1**

**Fig. S4** TG curve of complex **2**

**Fig. S5** DSC curve of complex **1** under the linear heating rate of 5 °C/min

**Fig. S6** DSC curve of complex **1** under the linear heating rate of 10 °C/min

**Fig. S7** DSC curve of complex **1** under the linear heating rate of 15 °C/min

**Fig. S8** DSC curve of complex **1** under the linear heating rate of 20 °C/min

**Fig. S9** DSC curve of complex **2** under the linear heating rate of 5 °C/min

**Fig. S10** DSC curve of complex **2** under the linear heating rate of 10 °C/min

**Fig. S11** DSC curve of complex **2** under the linear heating rate of 15 °C/min

**Fig. S12** DSC curve of complex **2** under the linear heating rate of 20 °C/min

**Fig. S13** DSC curve of complex **1** + RDX under the linear heating rate of 5 °C/min

**Fig. S14** DSC curve of complex **1** + RDX under the linear heating rate of 10 °C/min

**Fig. S15** DSC curve of complex **1** + RDX under the linear heating rate of 15 °C/min

**Fig. S16** DSC curve of complex **1** + RDX under the linear heating rate of 20 °C/min

**Fig. S17** DSC curve of complex **2** + RDX under the linear heating rate of 5 °C/min

**Fig. S18** DSC curve of complex **2** + RDX under the linear heating rate of 10 °C/min

**Fig. S19** DSC curve of complex **2** + RDX under the linear heating rate of 15 °C/min

**Fig. S20** DSC curve of complex **2** + RDX under the linear heating rate of 20 °C/min

\*Corresponding author: Prof. Qi Yang

E-mail: yangqi@nwu.edu.cn

**Table S1** Selected bond distances (Å) and angles (°) for **1** and **2**

| Co(TO) <sub>2</sub> (DNBA) <sub>2</sub> (H <sub>2</sub> O) <sub>2</sub> ( <b>1</b> ) |            |                      |            |
|--------------------------------------------------------------------------------------|------------|----------------------|------------|
| Co(1)-N(1)                                                                           | 2.095(3)   | Co(1)-O(7)           | 2.116(2)   |
| Co(1)-O(8)                                                                           | 2.115(2)   |                      |            |
| N(1)-Co(1)-N(1)                                                                      | 180.0(2)   | N(1)#1-Co(1)-O(8)    | 92.32(9)   |
| O(8)-Co(1)-O(8)                                                                      | 180.0(2)   | N(1)-Co(1)-O(7)#1    | 91.02(7)   |
| N(1)#1-Co(1)-O(7)                                                                    | 88.98(7)   | O(8)-Co(1)-O(7)#1    | 87.57(8)   |
| O(8)#1-Co(1)-O(7)                                                                    | 92.43(8)   | N(1)-Co(1)-O(7)      | 88.98(7)   |
| N(1)#1-Co(1)-O(7)                                                                    | 91.02(7)   | O(8)-Co(1)-O(7)      | 92.43(8)   |
| O(8)#1-Co(1)-O(7)                                                                    | 87.57(8)   | Co(1)-O(8)-H(8W)     | 100(3)     |
| Cu(HTZA)(DNBA) ( <b>2</b> )                                                          |            |                      |            |
| Cu(1)-O(7)#1                                                                         | 1.959(4)   | O(1)-Cu(1)-O(6)      | 88.3(2)    |
| Cu(1)-O(8)#1                                                                         | 1.960(5)   | O(7)#1-Cu(1)-N(4)#2  | 100.56(19) |
| Cu(1)-O(1)                                                                           | 1.969(5)   | O(8)#1-Cu(1)-N(4)#2  | 95.3(2)    |
| Cu(1)-O(6)                                                                           | 1.985(4)   | O(1)-Cu(1)-N(4)#2    | 97.5(2)    |
| Cu(1)-N(4)#2                                                                         | 2.159(5)   | O(7)#1-Cu(1)-Cu(1)#1 | 80.55(13)  |
| O(7)#1-Cu(1)-O(8)#1                                                                  | 89.4(2)    | O(8)#1-Cu(1)-Cu(1)#1 | 81.07(15)  |
| O(7)#1-Cu(1)-O(1)                                                                    | 89.5(2)    | O(1)-Cu(1)-Cu(1)#1   | 86.12(14)  |
| O(8)#1-Cu(1)-O(1)                                                                    | 167.15(19) | O(6)-Cu(1)-Cu(1)#1   | 86.70(13)  |
| O(7)#1-Cu(1)-O(6)                                                                    | 167.18(18) | N(4)#2-Cu(1)-Cu(1)#1 | 176.18(15) |
| O(8)#1-Cu(1)-O(6)                                                                    | 90.0(2)    |                      |            |

Symmetry transformations used to generate equivalent atoms: #1=-x+1,-y,-z; #2=-x+1,-y+1,-z

**Table S2** Hydrogen bonding interactions in **1**

| D—H···A              | H···A (Å) | D···A (Å) | D—H···A (Å) | D—H···A (°) |
|----------------------|-----------|-----------|-------------|-------------|
| N(2)-H(2)...O(8)#2   | 0.86      | 2.21      | 2.844(3)    | 130.6       |
| N(2)-H(2)...O(7)     | 0.86      | 2.55      | 2.980(3)    | 112.1       |
| O(8)-H(8WB)...O(1)#3 | 0.83(4)   | 1.99(4)   | 2.759(3)    | 155(4)      |
| O(8)-H(8WA)...O(6)   | 0.82(4)   | 1.77(4)   | 2.568(3)    | 164(4)      |

Symmetry transformations used to generate equivalent atoms:

#1 -x+1,-y+1,-z    #2 x+1,y,z    #3 x-1,y,z

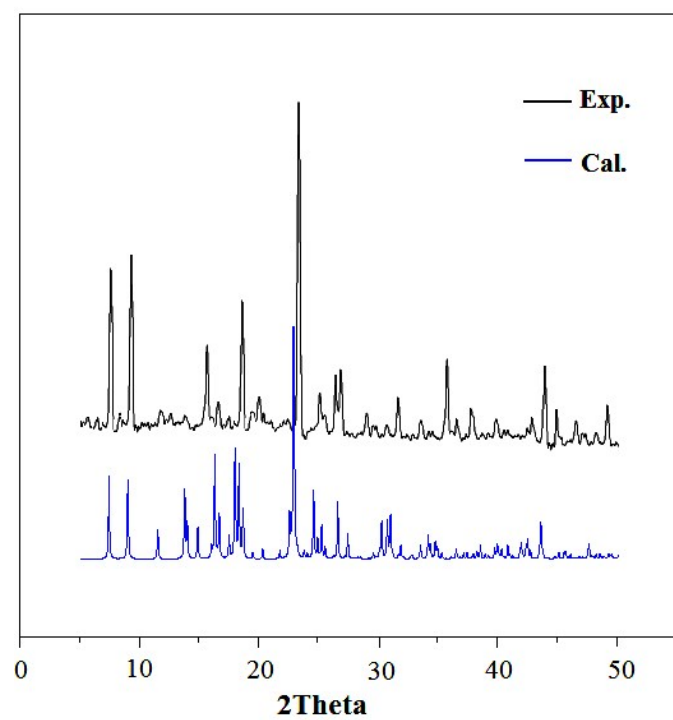

**Fig. S1** XRPD curves for complex 1.

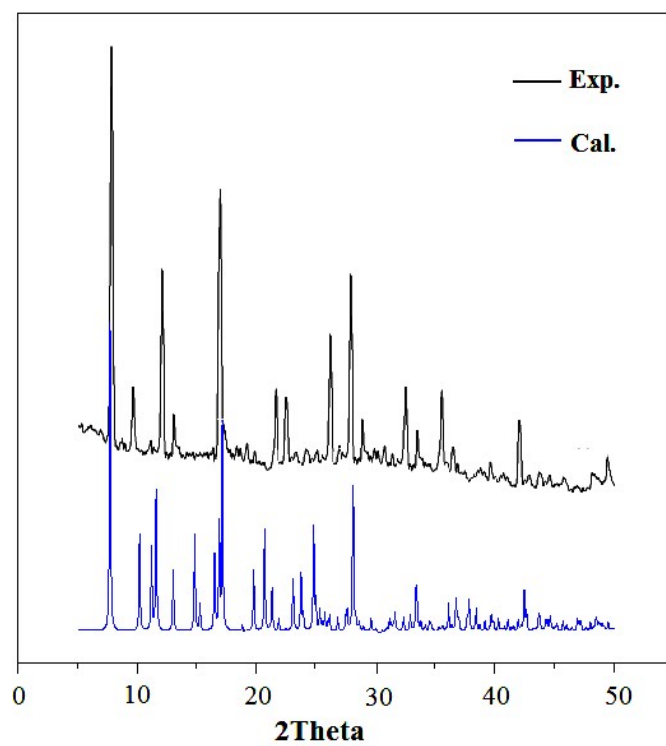

**Fig. S2** XRPD curves for complex 2.

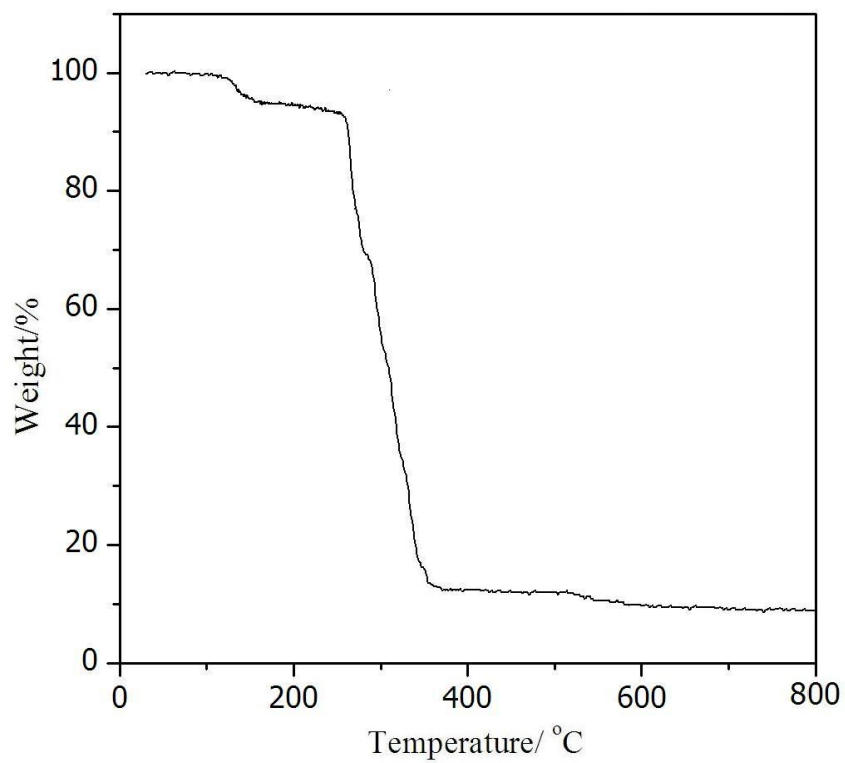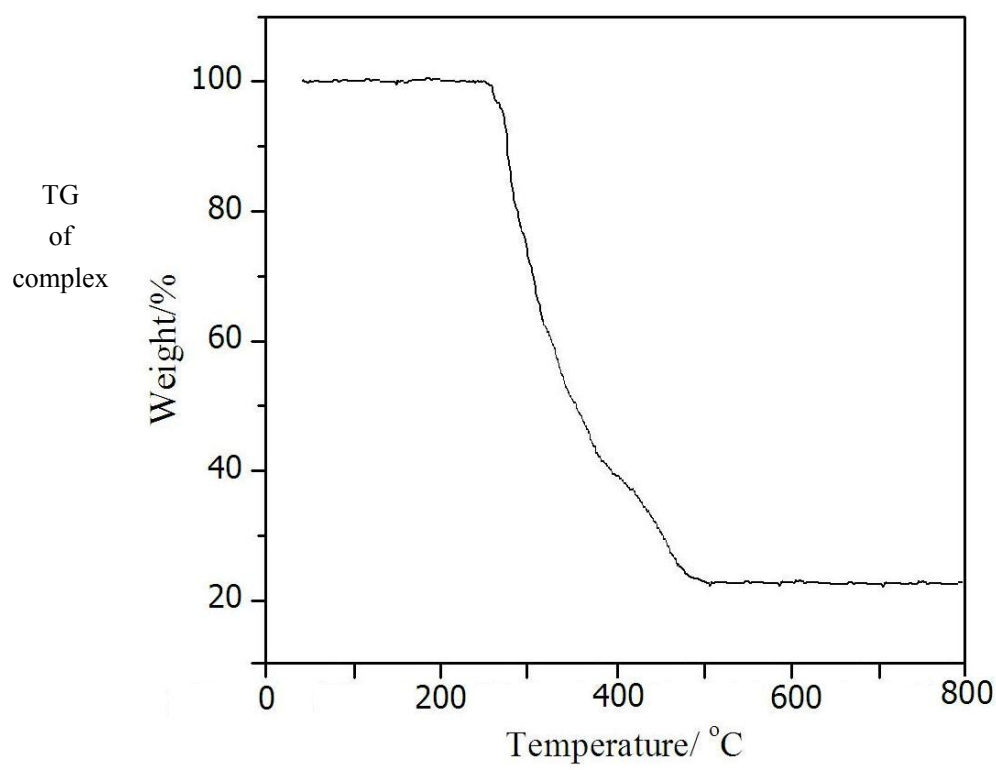

**Fig. S3**  
curve

1

Fig. S4 TG curve of complex 2

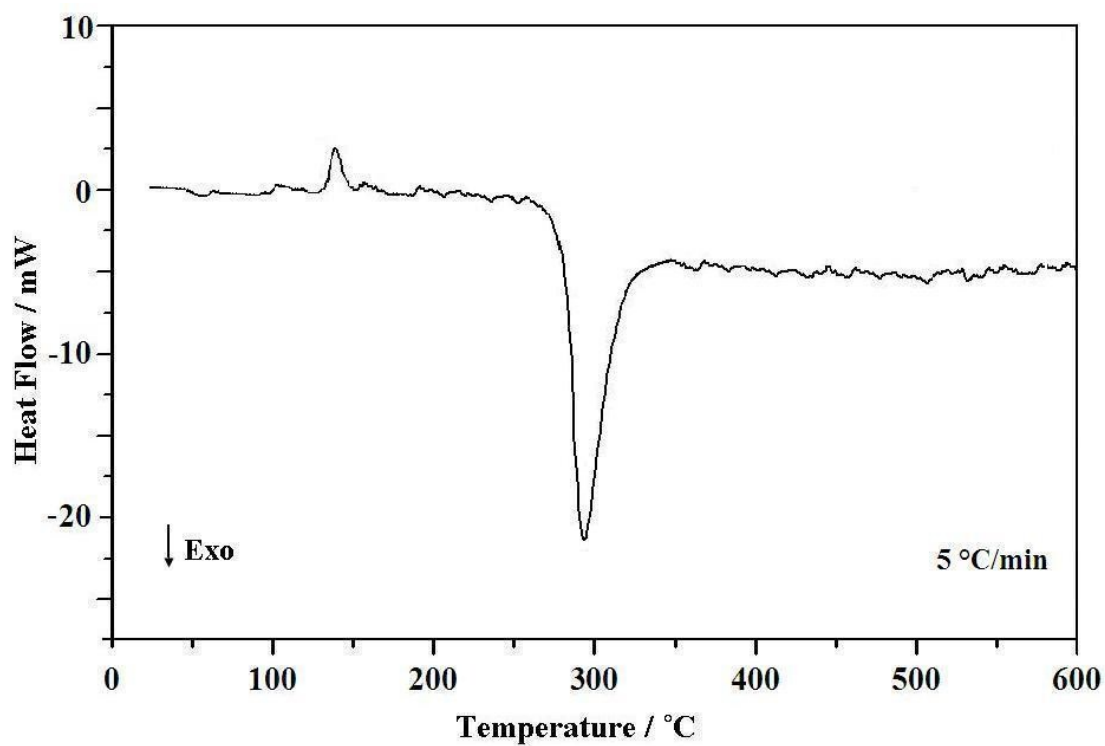

Fig. S5 DSC curve of complex 1 under the linear heating rate of 5 °C/min

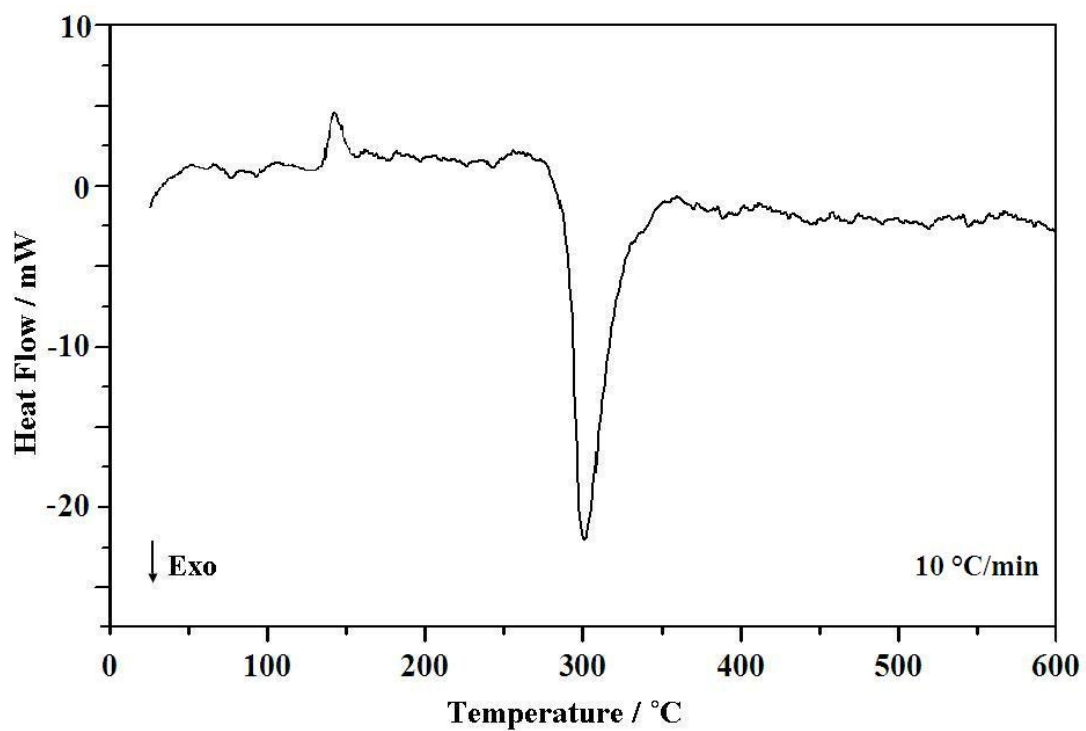

Fig. S6 DSC curve of complex 1 under the linear heating rate of 10 °C/min

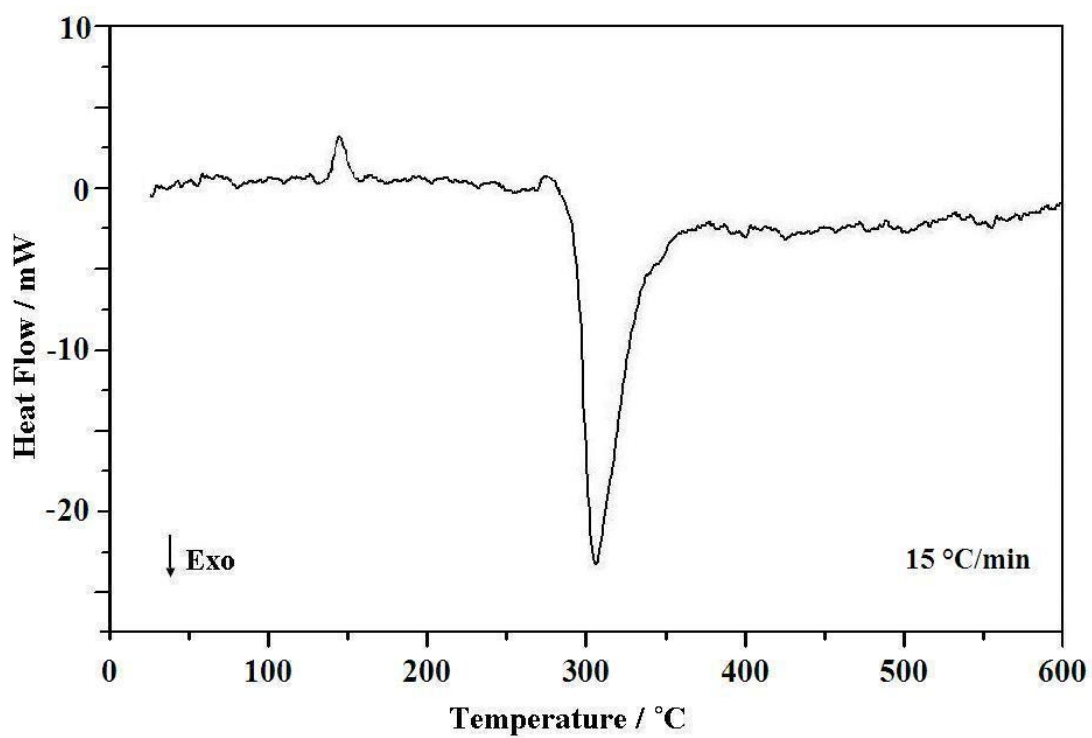

Fig. S7 DSC curve of complex 1 under the linear heating rate of 15 °C/min

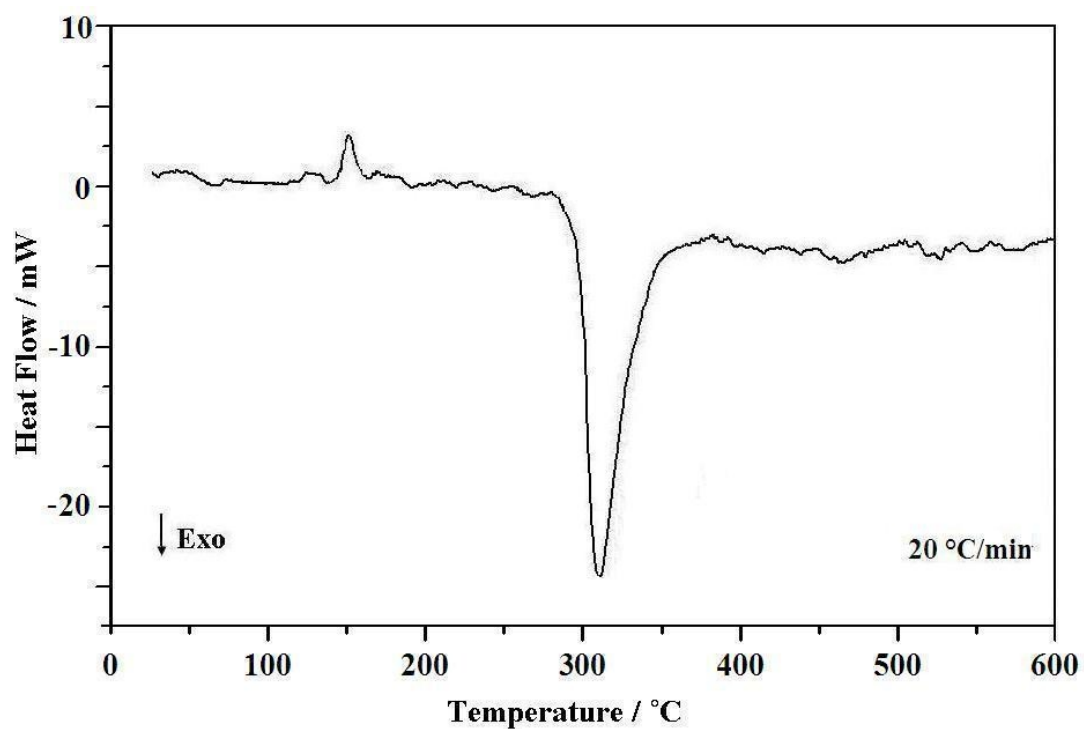

Fig. S8 DSC curve of complex 1 under the linear heating rate of 20 °C/min

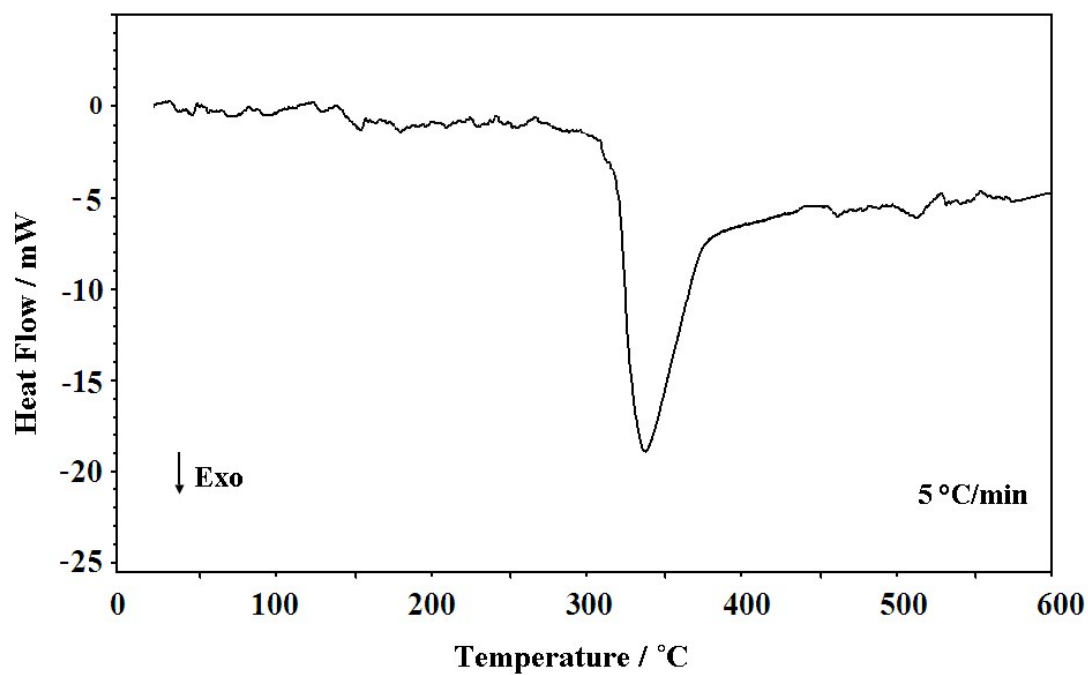

Fig. S9 DSC curve of complex 2 under the linear heating rate of 5 °C/min

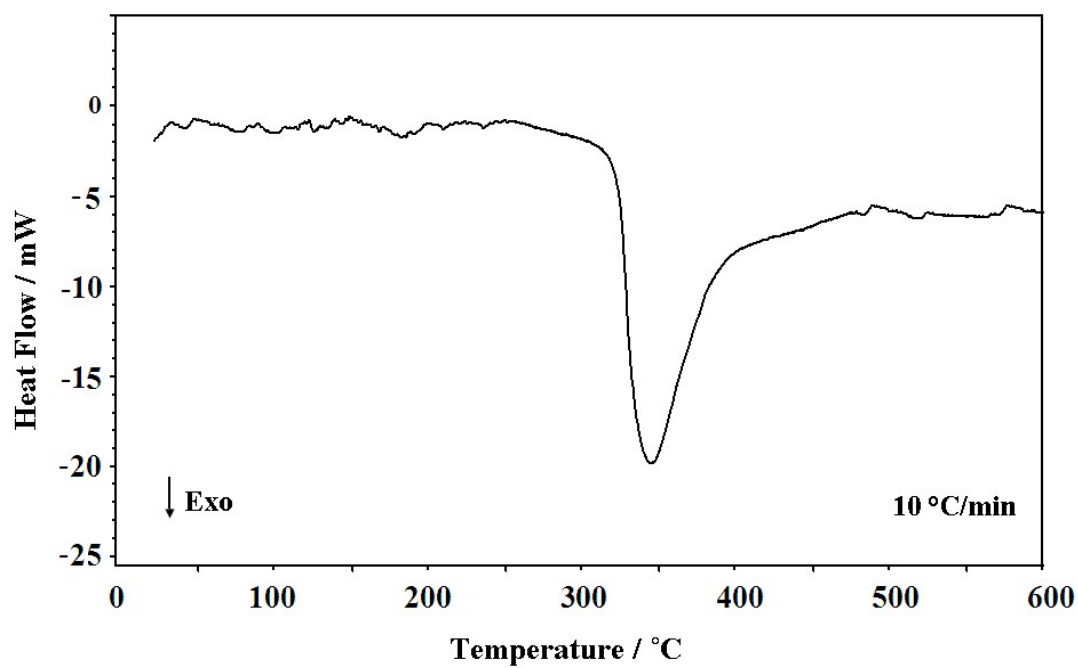

Fig. S10 DSC curve of complex 2 under the linear heating rate of 10 °C/min

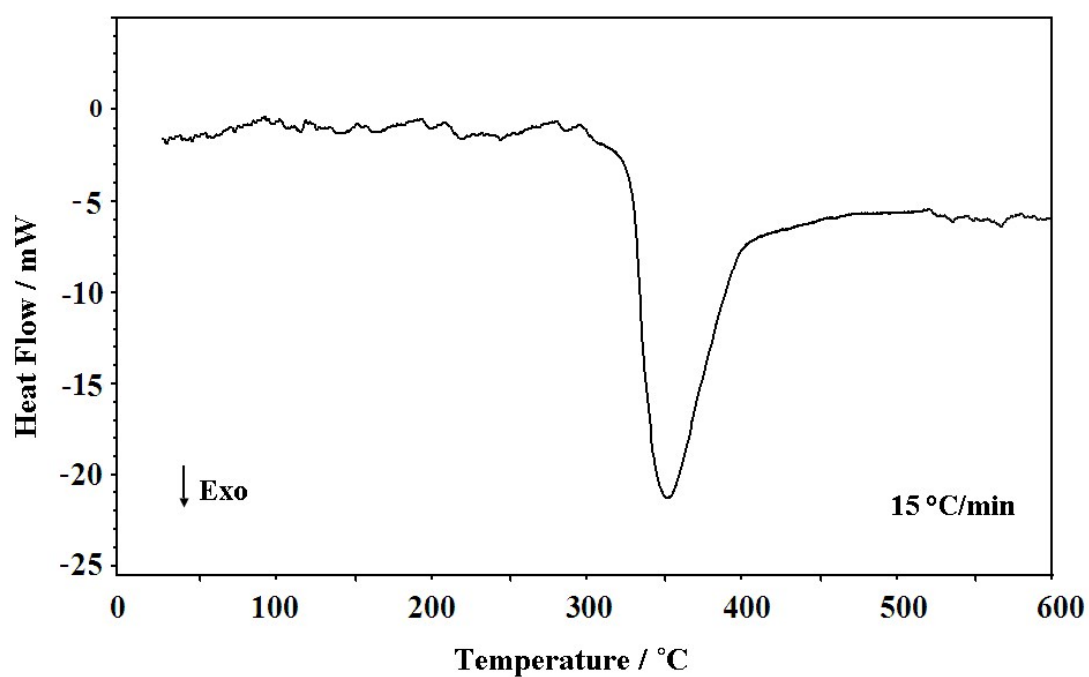

Fig. S11 DSC curve of complex 2 under the linear heating rate of 15 °C/min



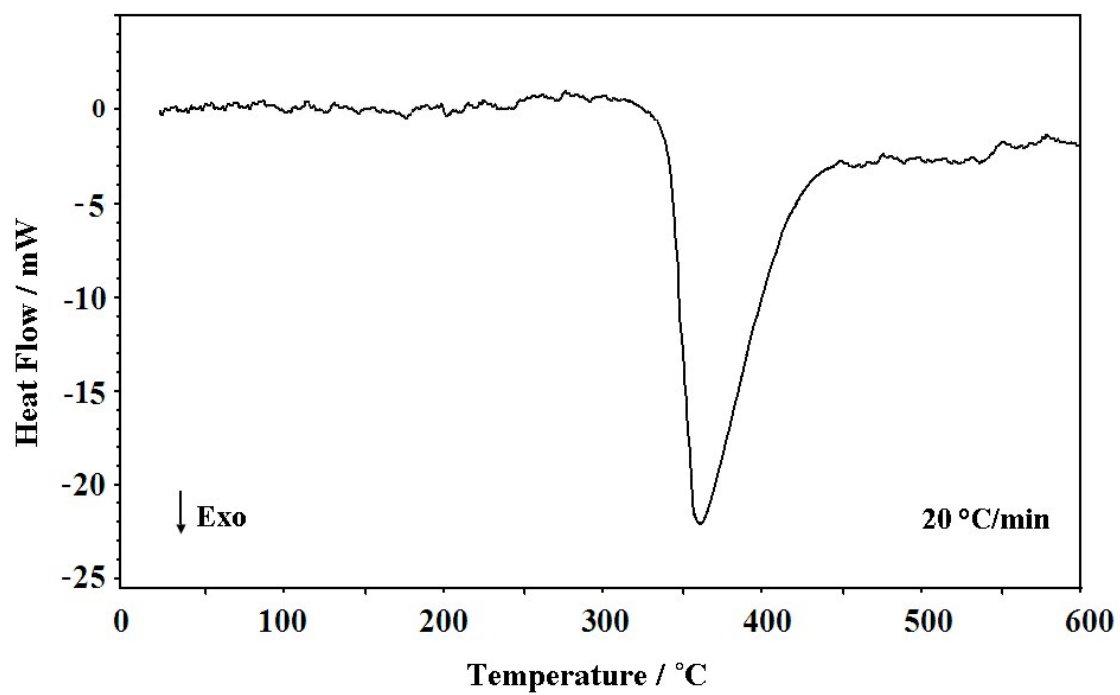

Fig. S12 DSC curve of complex 2 under the linear heating rate of 20 °C/min

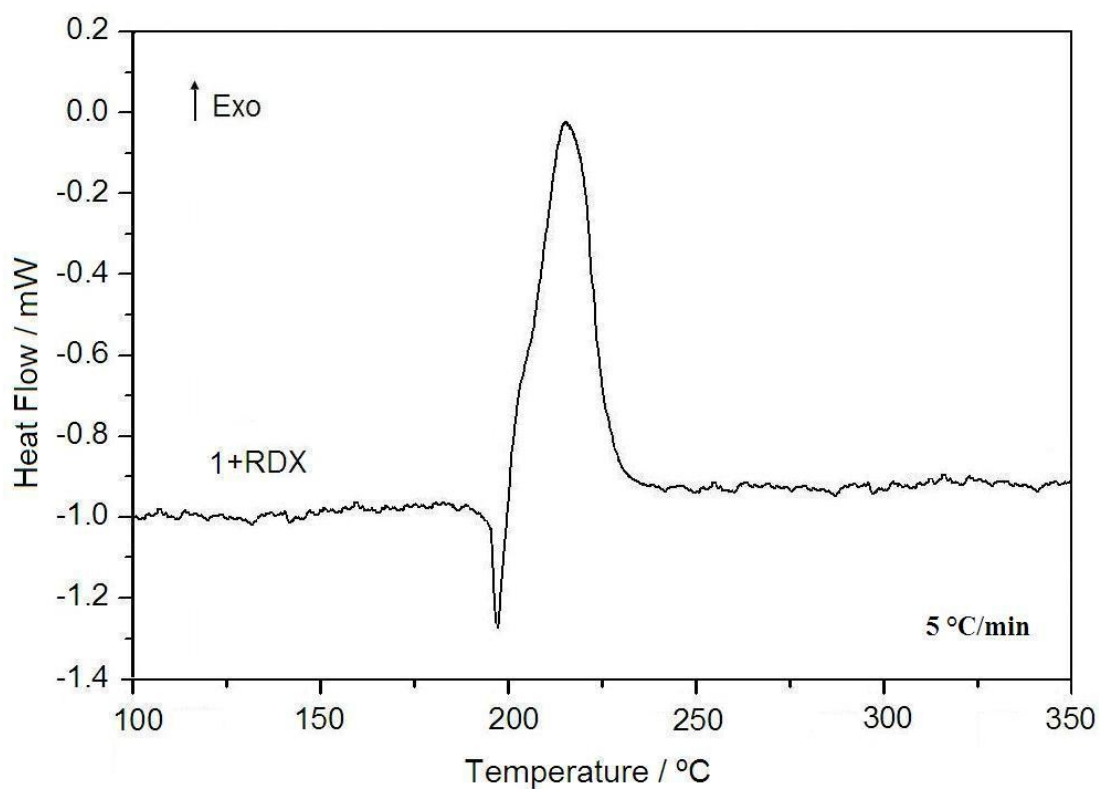

Fig. S13 DSC curve of complex 1 + RDX under the linear heating rate of 5 °C/min

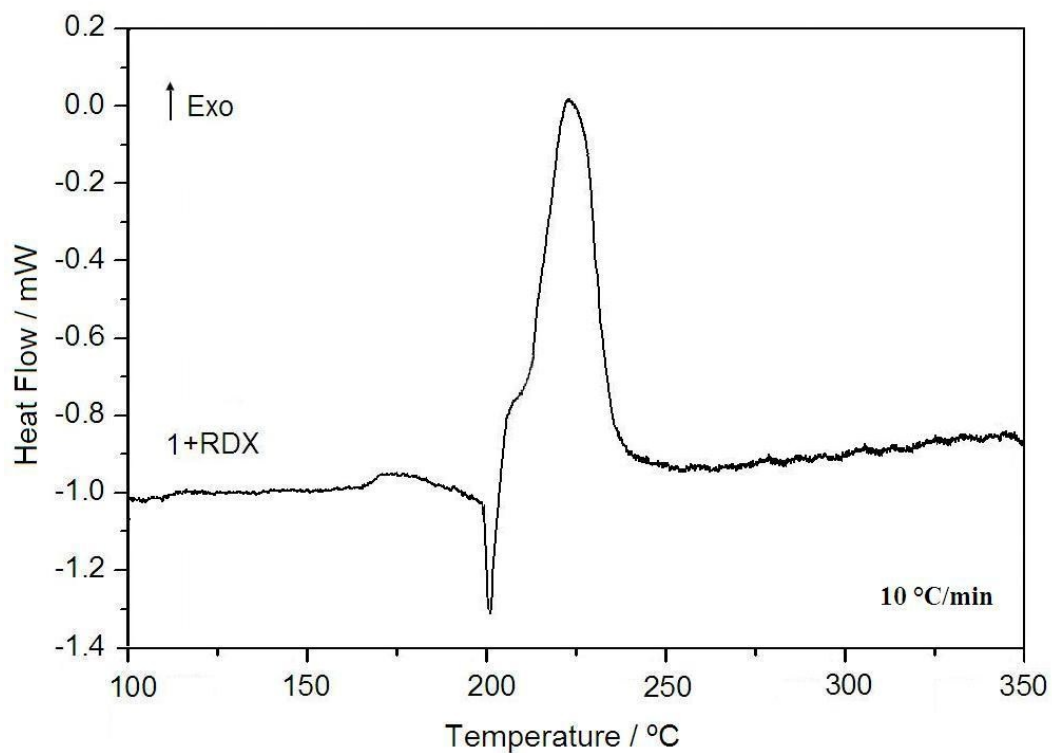

**Fig. S14** DSC curve of complex **1** + RDX under the linear heating rate of 10 °C/min

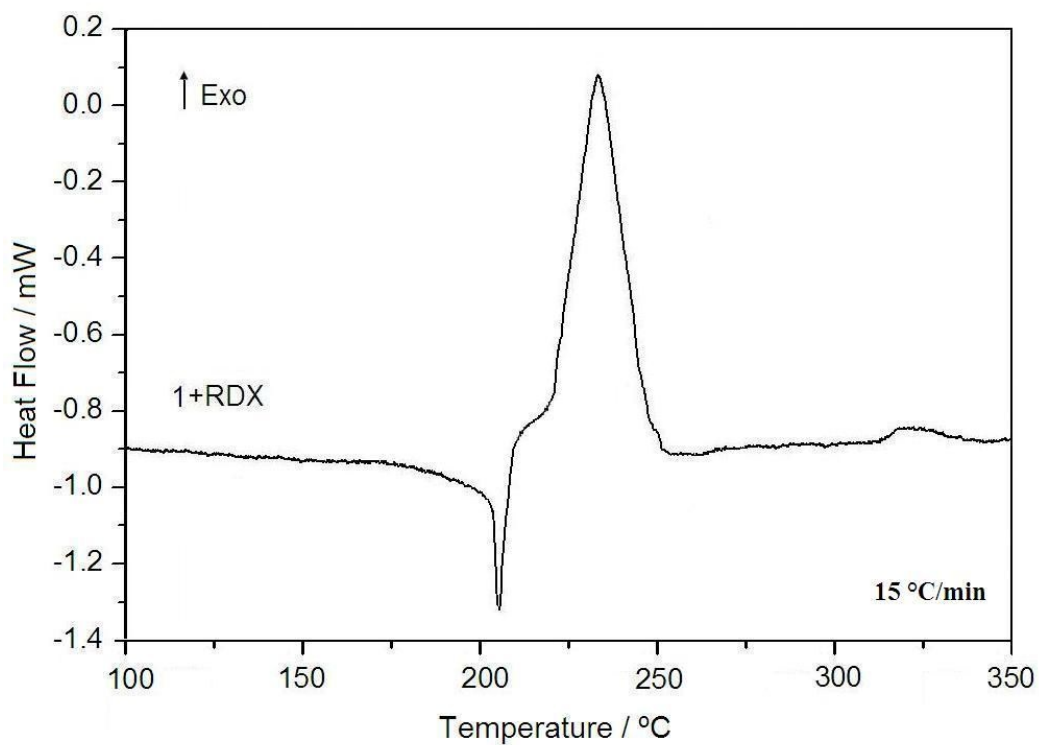

**Fig. S15** DSC curve of complex **1** + RDX under the linear heating rate of 15 °C/min

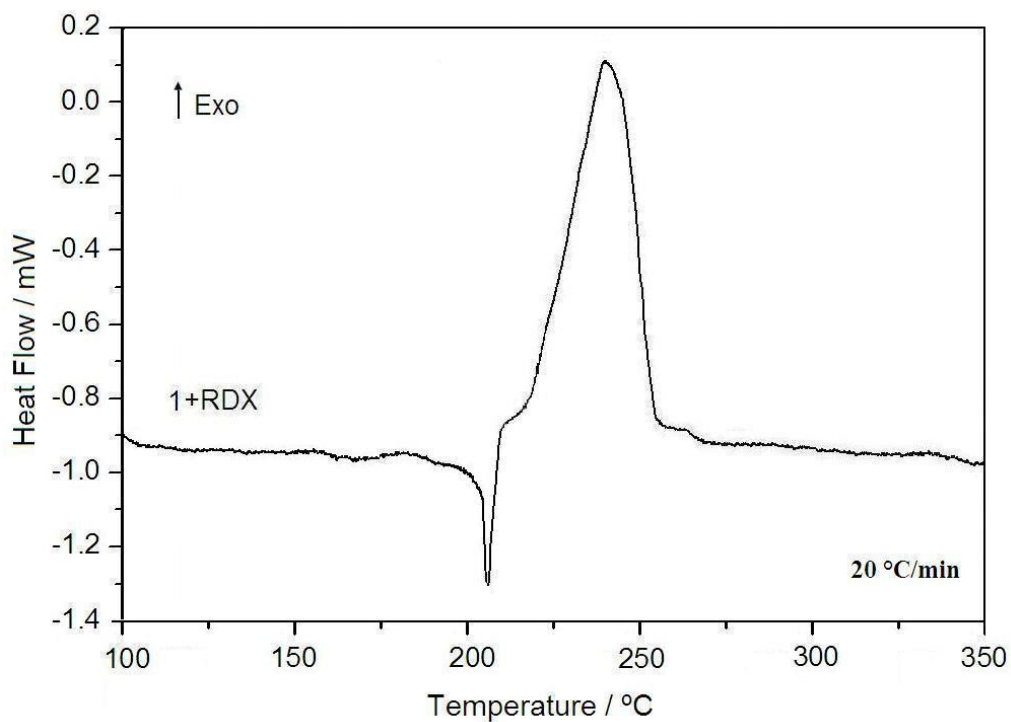

**Fig. S16** DSC curve of complex **1** + RDX under the linear heating rate of 20 °C/min

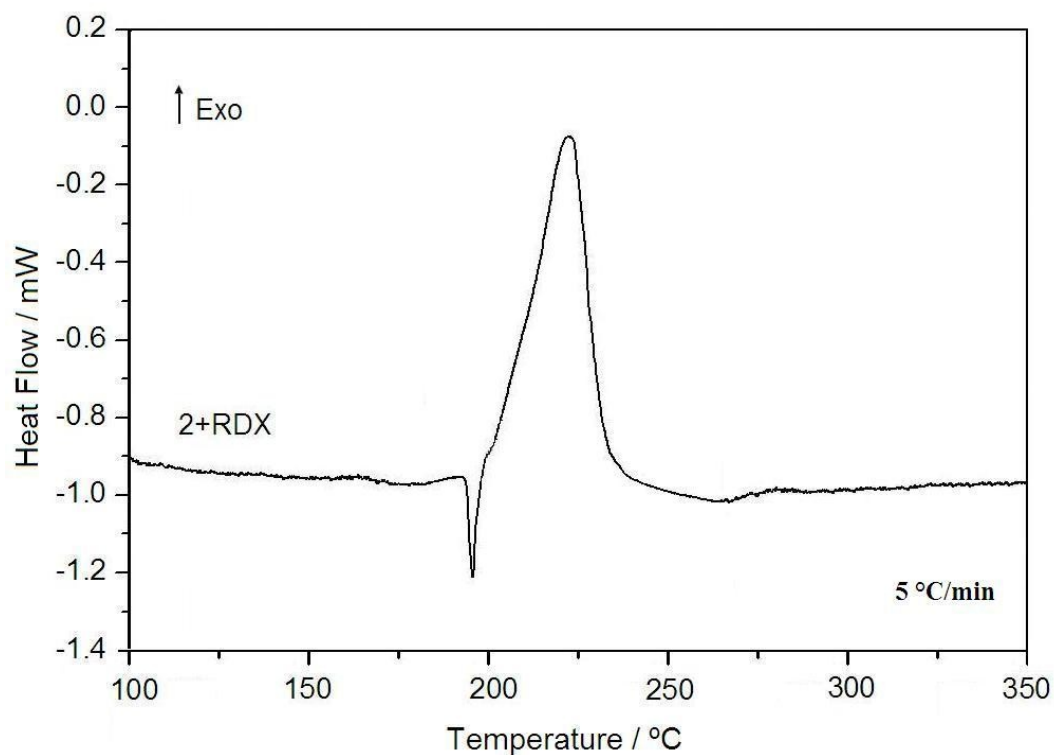

**Fig. S17** DSC curve of complex **2** + RDX under the linear heating rate of 5 °C/min

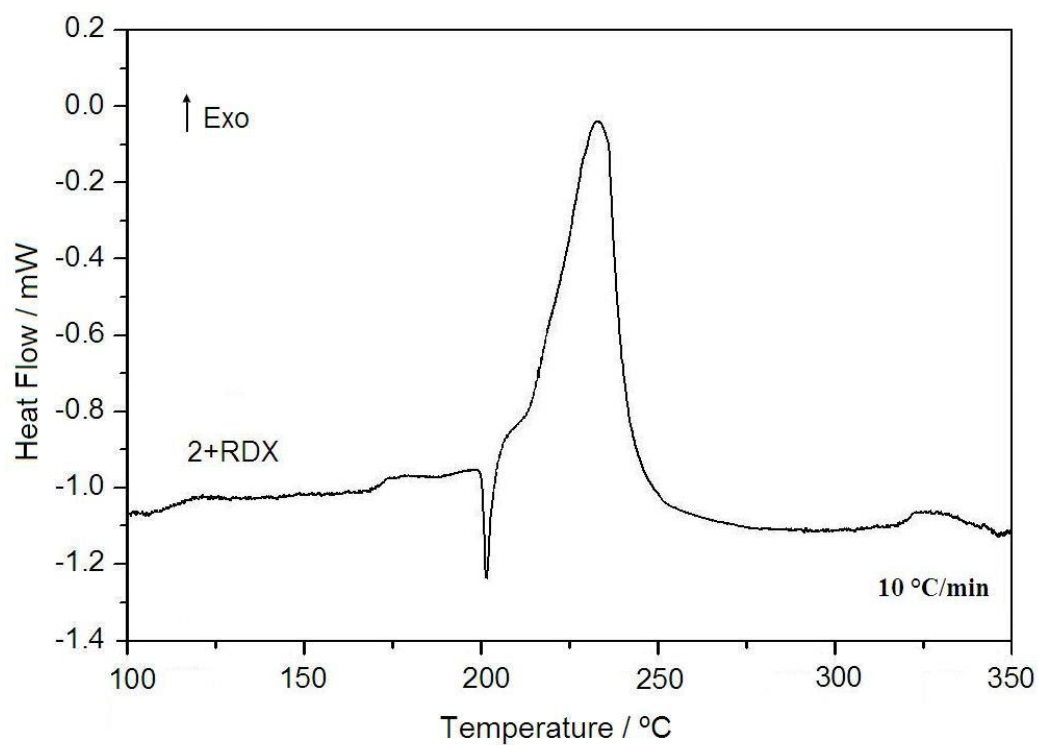

**Fig. S18** DSC curve of complex 2 + RDX under the linear heating rate of 10 °C/min

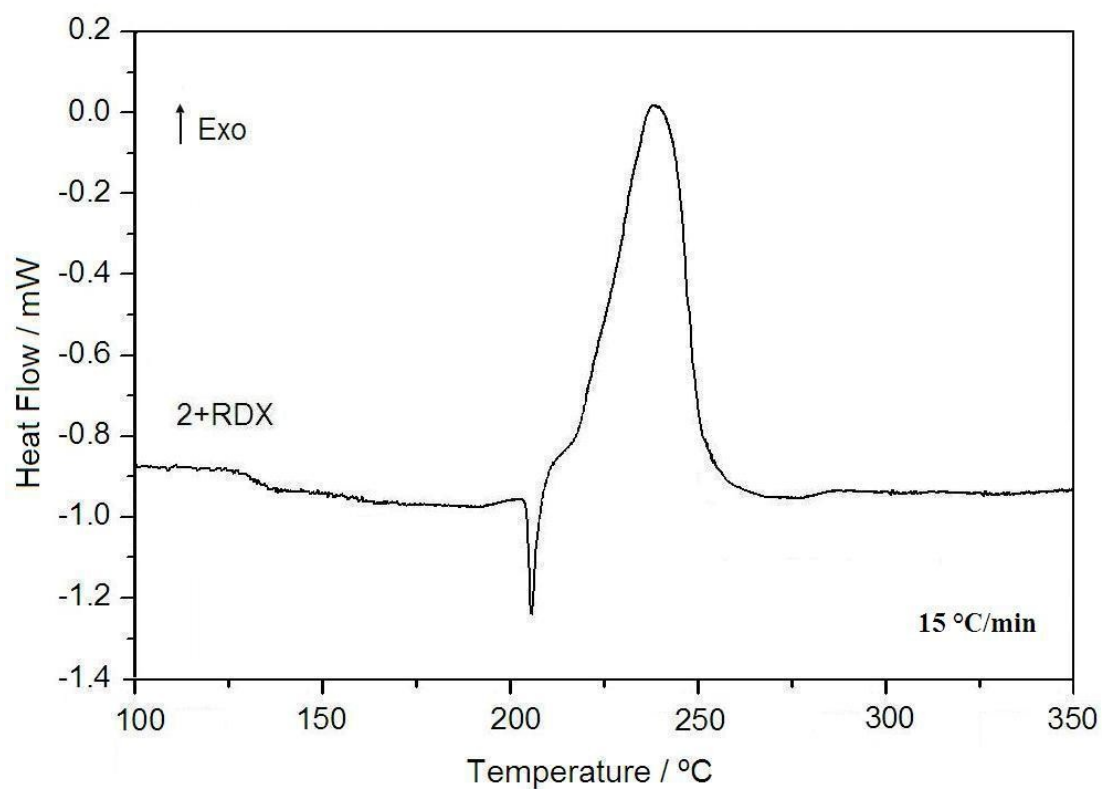

**Fig. S19** DSC curve of complex 2 + RDX under the linear heating rate of 15 °C/min

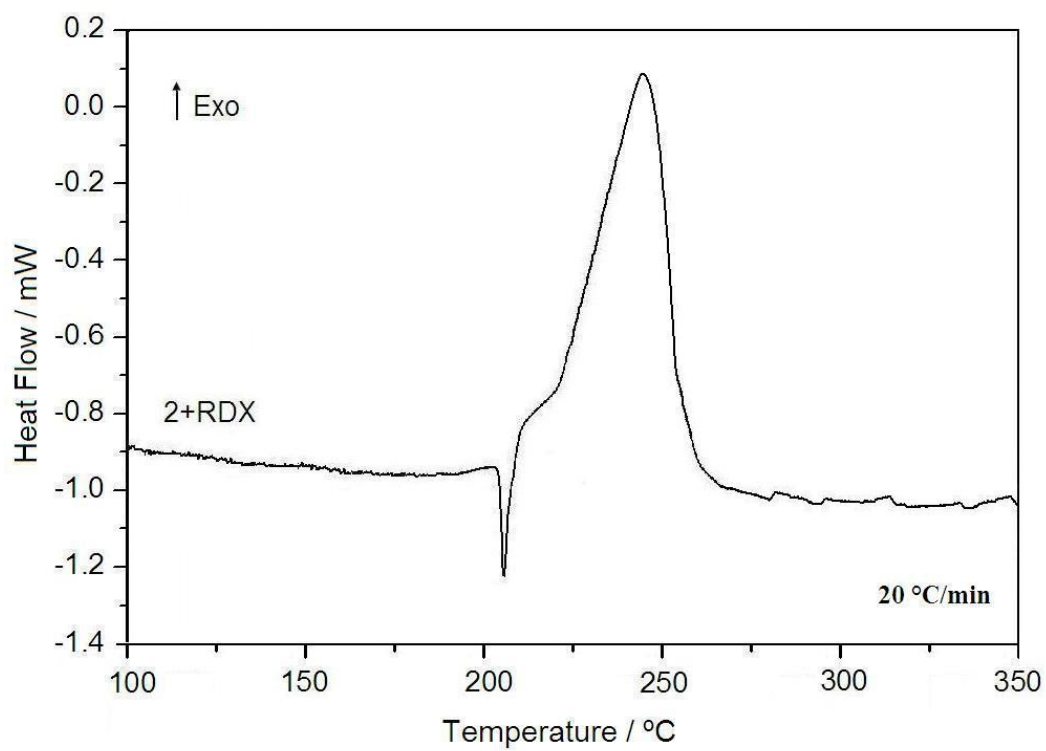

**Fig. S20** DSC curve of complex **2** + RDX under the linear heating rate of 20 °C/min
